# Supplementary material for: Antibacterial and Antioxidant Activities of Triterpenoids and Cyclic 1,7-Diarylheptanoids from the Stem Bark of Myrica salicifolia: A Combined Experimental and Computational Study
Source: Hindawi journal article supplement (doi:10.1155/2024/2013446), 2024-02-12
Supplement: f1 [file 2013446.f1.docx]

**Antibacterial and Antioxidant Activities of Triterpenoids and Cyclic 1,7-diarylheptanoids from Stem Bark of *Myrica Salicifolia*: A combined experimental and computational study**

**Abraham Dilnesa Gashaw,1 Kibrom Gebreheiwot Bedane,1 Taye B. Demissie,2 Japheth O. Ombito,2 Estifanos Ele Yaya*,1 and Mekonnen Abebayehu Desta*1**

**1** Department of Chemistry, College of Natural and Computational Sciences, Addis Ababa University, PO Box 1176, Addis Ababa, Ethiopia

2 Department of Chemistry, University of Botswana, P/Bag UB 0022, Gaborone, Botswana

Correspondence should be addressed to [mekonnen.abebayehu@aau.edu.et](mailto:mekonnen.abebayehu@aau.edu.et) and [estifanose.ele@aau.edu.et](mailto:estifanose.ele@aau.edu.et).

#### Supplementary Materials

# Figure S1: 1H-NMR (600 MHz, DMSO) Spectrum of Myricanone (1).

# Figure S2: 13C-NMR (125 MHz, DMSO) Spectrum of Myricanone (1).

# Figure S3: DEPT-135 Spectrum of Myricanone (1).

# Figure S4: 1H-1H COSY Spectrum of Myricanone (1).

# Figure S5: HSQC Spectrum of Myricanone (1).

# Figure S6: HMBC Spectrum of Myricanone (1).

# Figure S7: HPLC-ESIMS Spectrum of Myricanone (1).


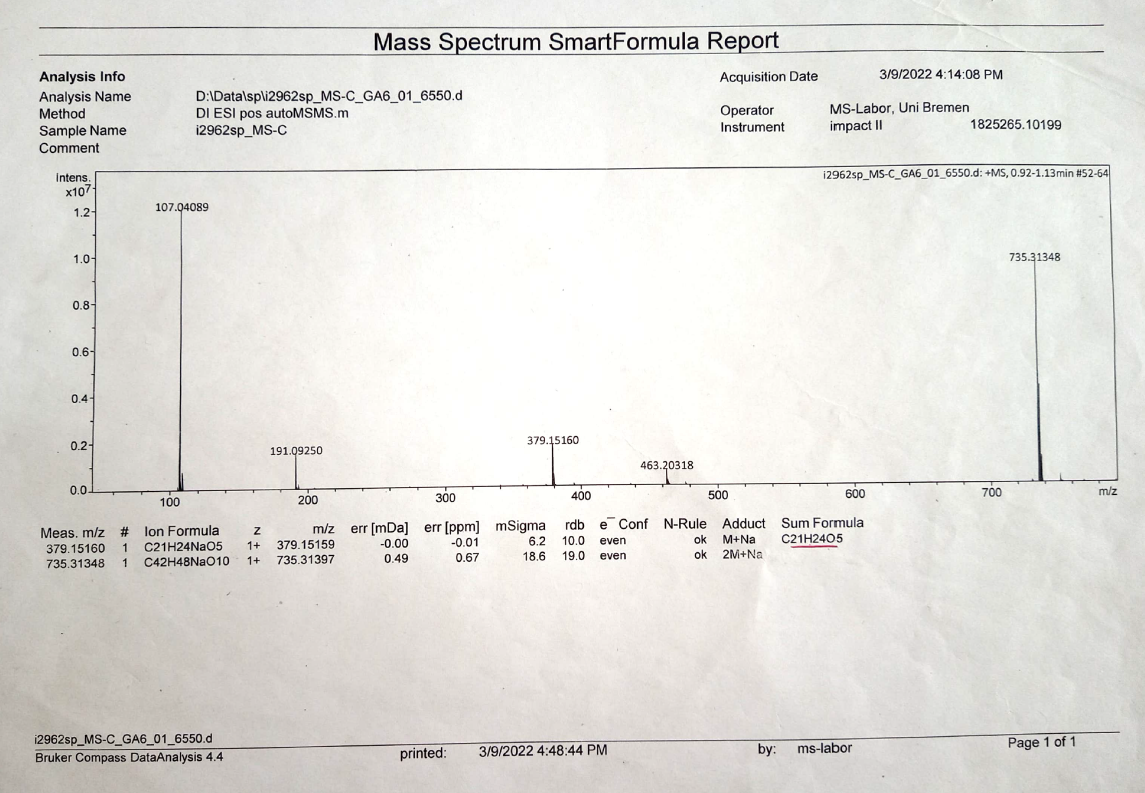


# Figure S8: FT-IR Spectrum of Myricanone (1).

# Figure S9: 1H-NMR (600 MHz, Acetone) Spectrum of Myricanol (2).

# Figure S10: 13C-NMR (125 MHz, Acetone) Spectrum of Myricanol (2).

# Figure S11: DEPT-135 Spectrum of Myricanol (2).

# Figure S12: 1H-1H COSY Spectrum of Myricanol (2).

# Figure S13: HSQC Spectrum of Myricanol (2).

# Figure S14: HMBC Spectrum of Myricanol (2)

# Figure S15: NOSEY Spectrum of Myricanol (2).

# Figure S16: ESIMS/MS Spectrum of Myricanol (2).


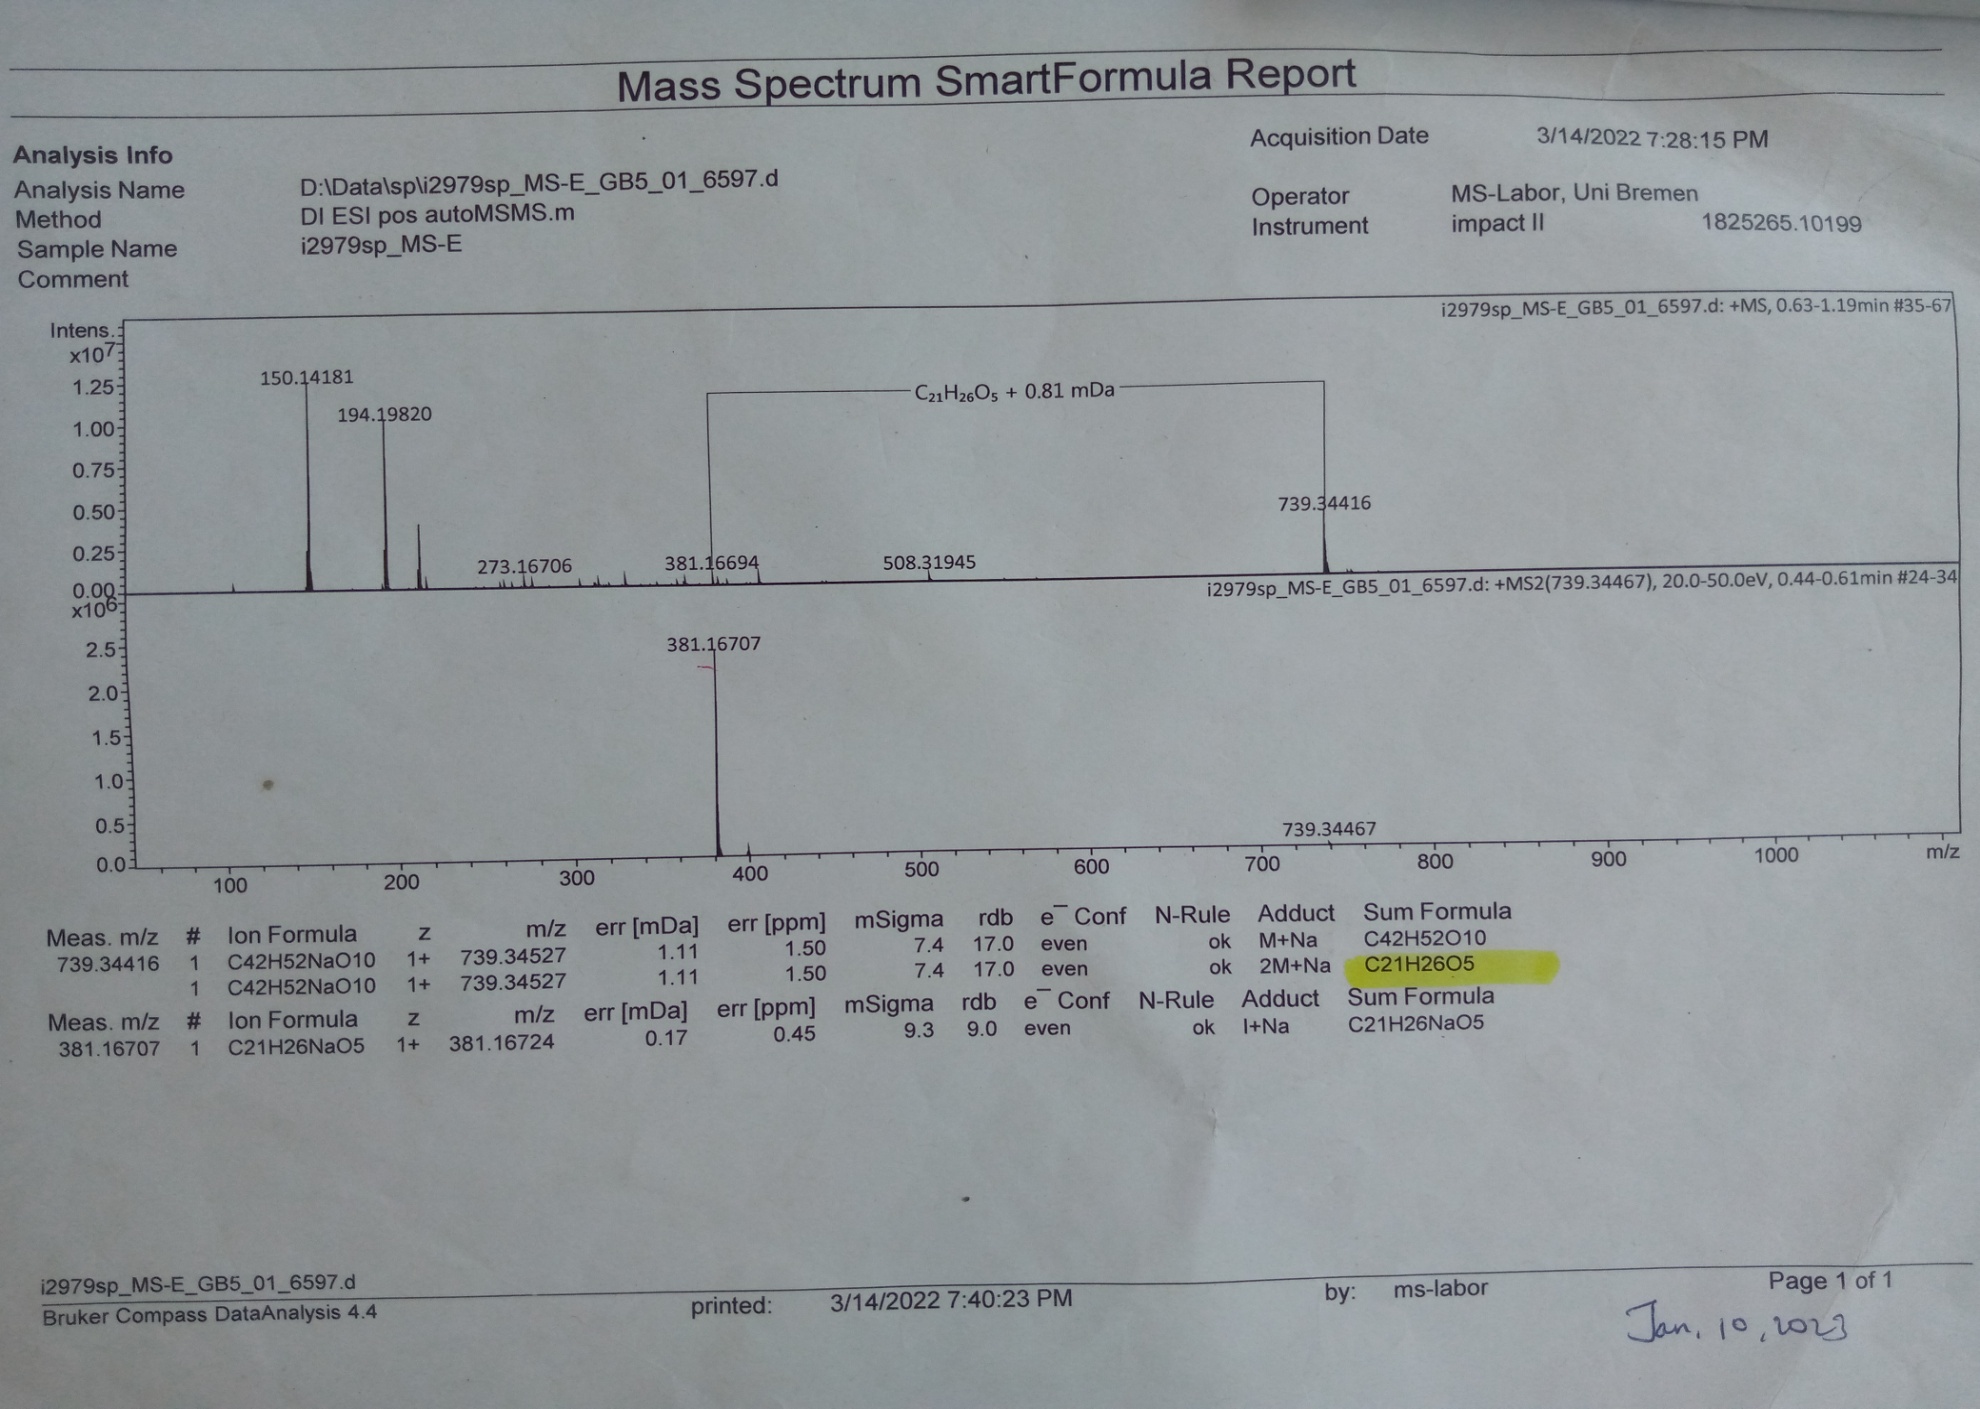


# Figure S17: FT-IR Spectrum of Myricanol (2).

# Figure S18: 1H-NMR (600 MHz, MeOD) Spectrum of 11-O-*β*-D-xylopyranosylmyricanol (3).

# Figure S19: 13C-NMR (125 MHz, MeOD) Spectrum of 11-O-*β*-D-xylopyranosylmyricanol (3).

# Figure S20: DEPT-135 (125 MHz, MeOD) Spectrum of 11-O-*β*-D-xylopyranosylmyricanol (3).

# Figure S21: 1H-1H COSY Spectrum of 11-O-*β*-D-xylopyranosylmyricanol (3).

# Figure S22: HSQC Spectrum of 11-O-*β*-D-xylopyranosylmyricanol (3).

# Figure S23: HMBC Spectrum of 11-O-*β*-D-xylopyranosylmyricanol (3).

Figure S24: NOESY Spectrum of 11-O-*β*-D-xylopyranosylmyricanol (**3**).

# Figure S25: ESIMS/MS Spectrum of 11-O-*β*-D-xylopyranosylmyricanol (3).


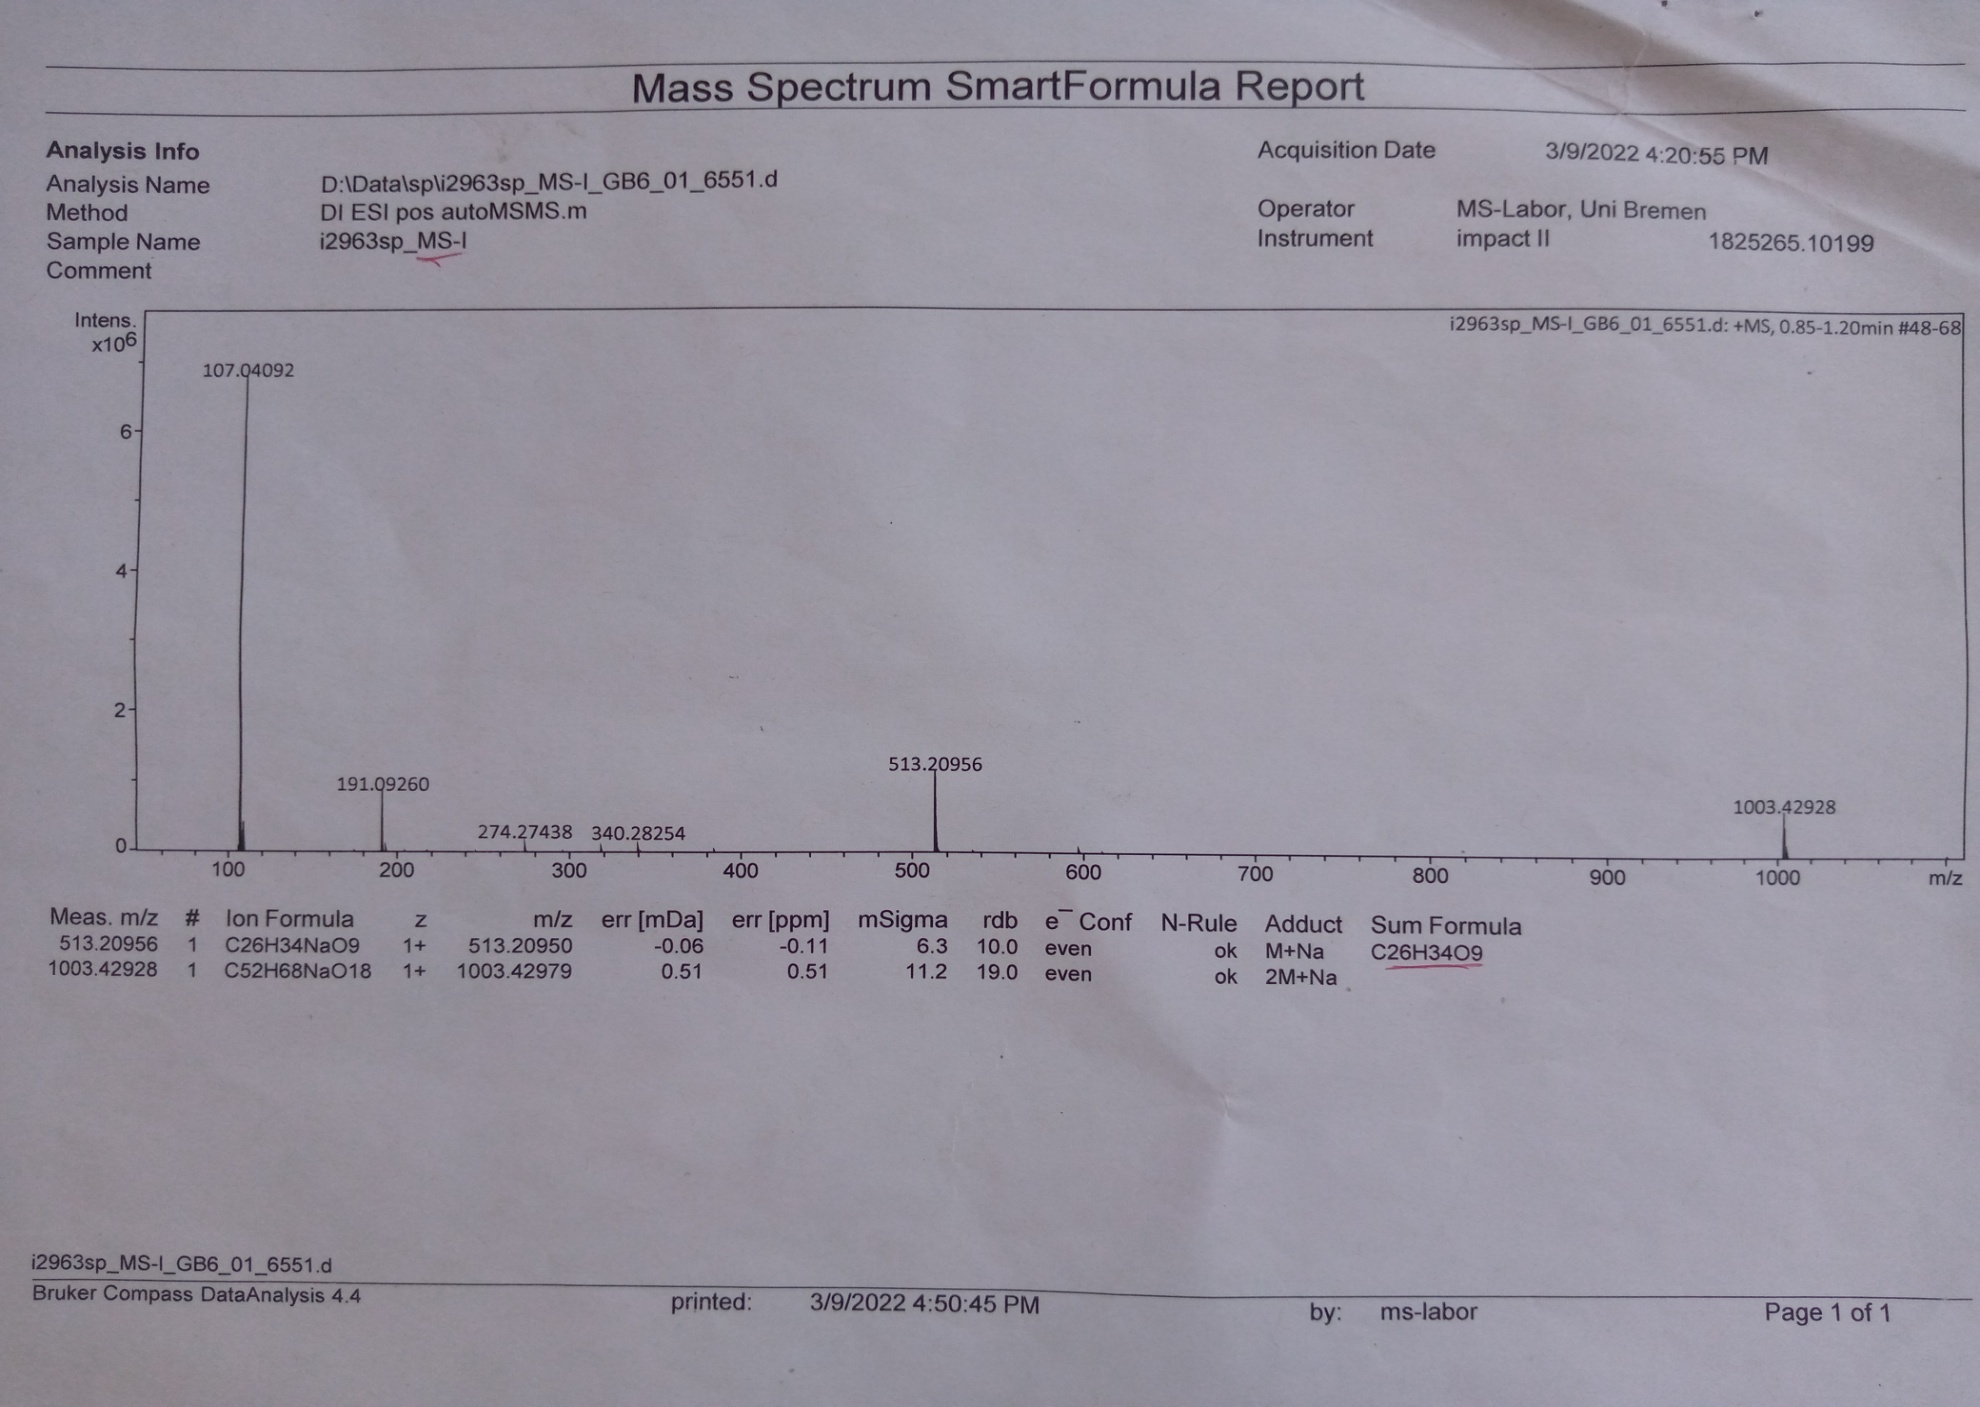


# Figure S26: FT-IR Spectrum of 11-O-*β*-D-xylopyranosylmyricanol (3).

#

# Figure S27: 1H-NMR (600 MHz, CDCl3) Spectrum of Taraxerone (4).

# Figure S28: 13C-NMR (125 MHz, CDCl3) Spectrum of Taraxerone (4).

# Figure S29: DEPT-135 Spectrum of Taraxerone (4).

# Figure S30: 1H-1H COSY Spectrum of Taraxerone (4).

# Figure S31: HSQC Spectrum of Taraxerone (4).

# Figure S32: HMBC Spectrum of Taraxerone (4).

Figure S33: NOSE Spectrum of Taraxerone (**4**).

# Figure S34: MALDI-MS/MS Spectrum of Taraxerone (4).


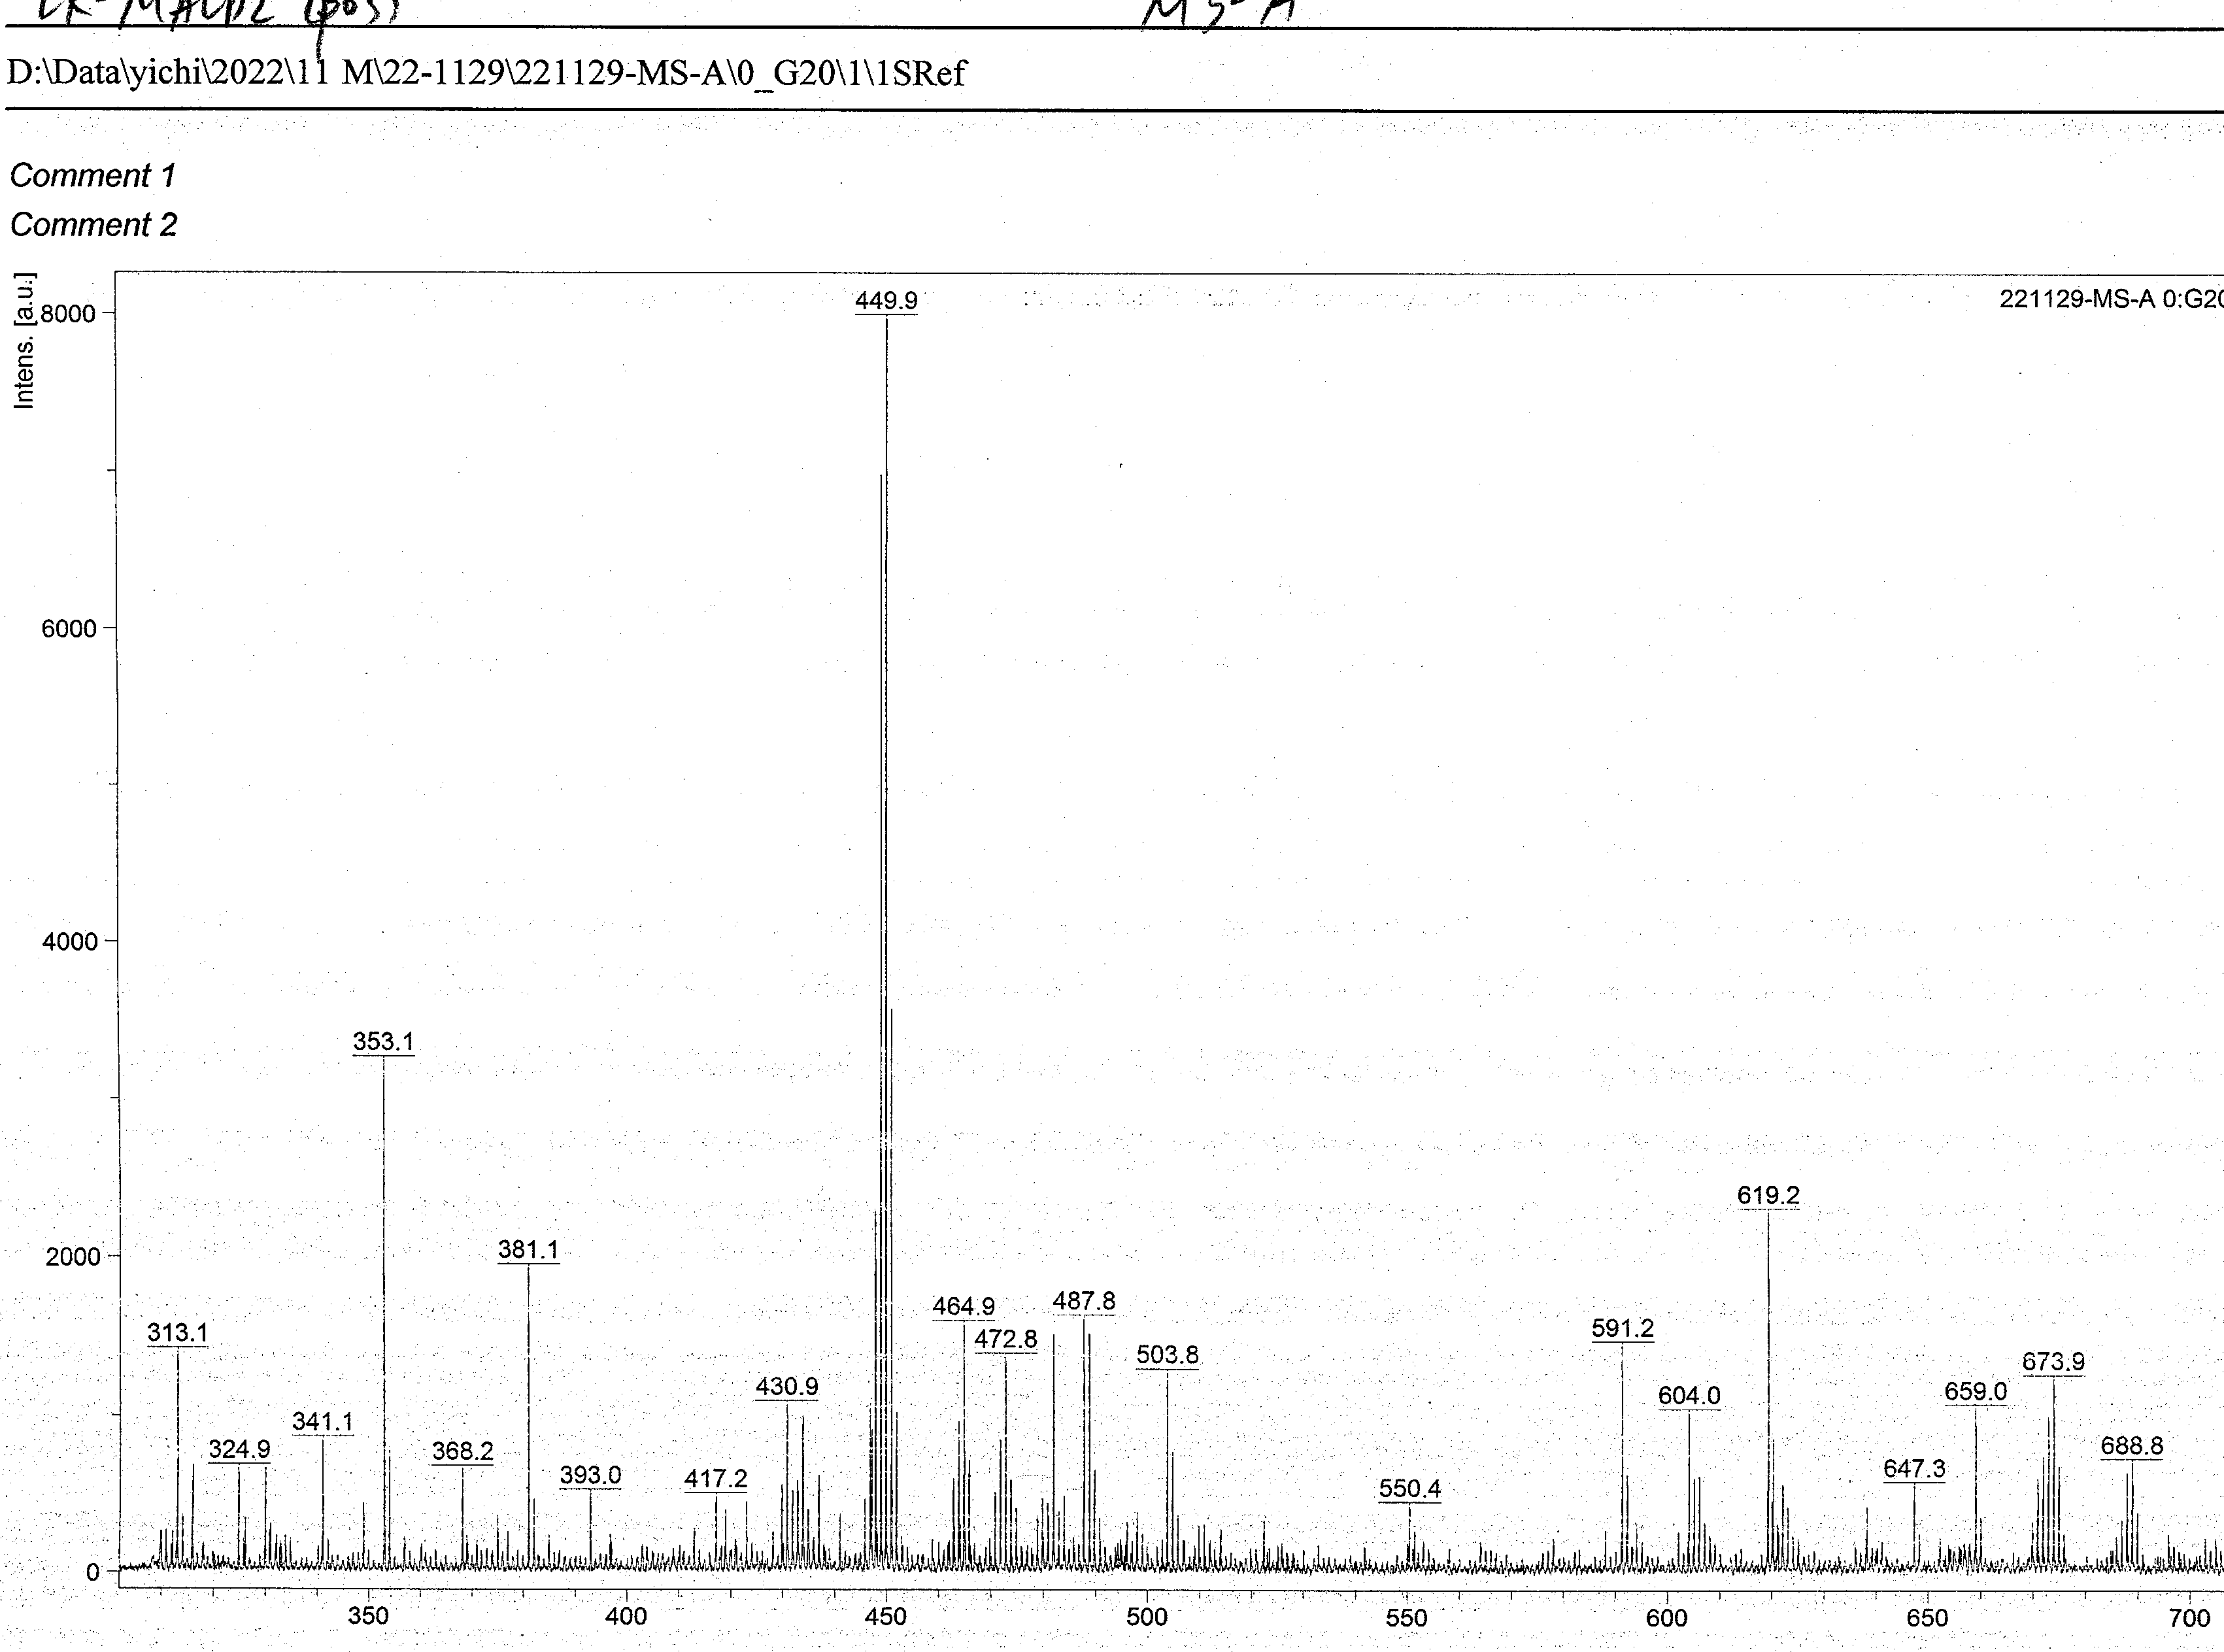


# Figure S35: FT-IR Spectrum of Taraxerone (4).

# Figure S36: 1H-NMR (600 MHz, CDCl3) Spectrum of Taraxerol (5).

# Figure S37: 13C-NMR (125 MHz, CDCl3) Spectrum of Taraxerol (5).

# Figure S38: DEPT-135 Spectrum of Taraxerol (5).

# Figure S39: 1H-1H COSY Spectrum of Taraxerol (5).

# Figure S40: HSQC Spectrum of Taraxerol (5).

#

# Figure S41: HMBC Spectrum of Taraxerol (5).

# Figure S42: NOSE Spectrum of Taraxerol(5).

# Figure S43: MALDI-MS/MS Spectrum of Taraxerol (5).


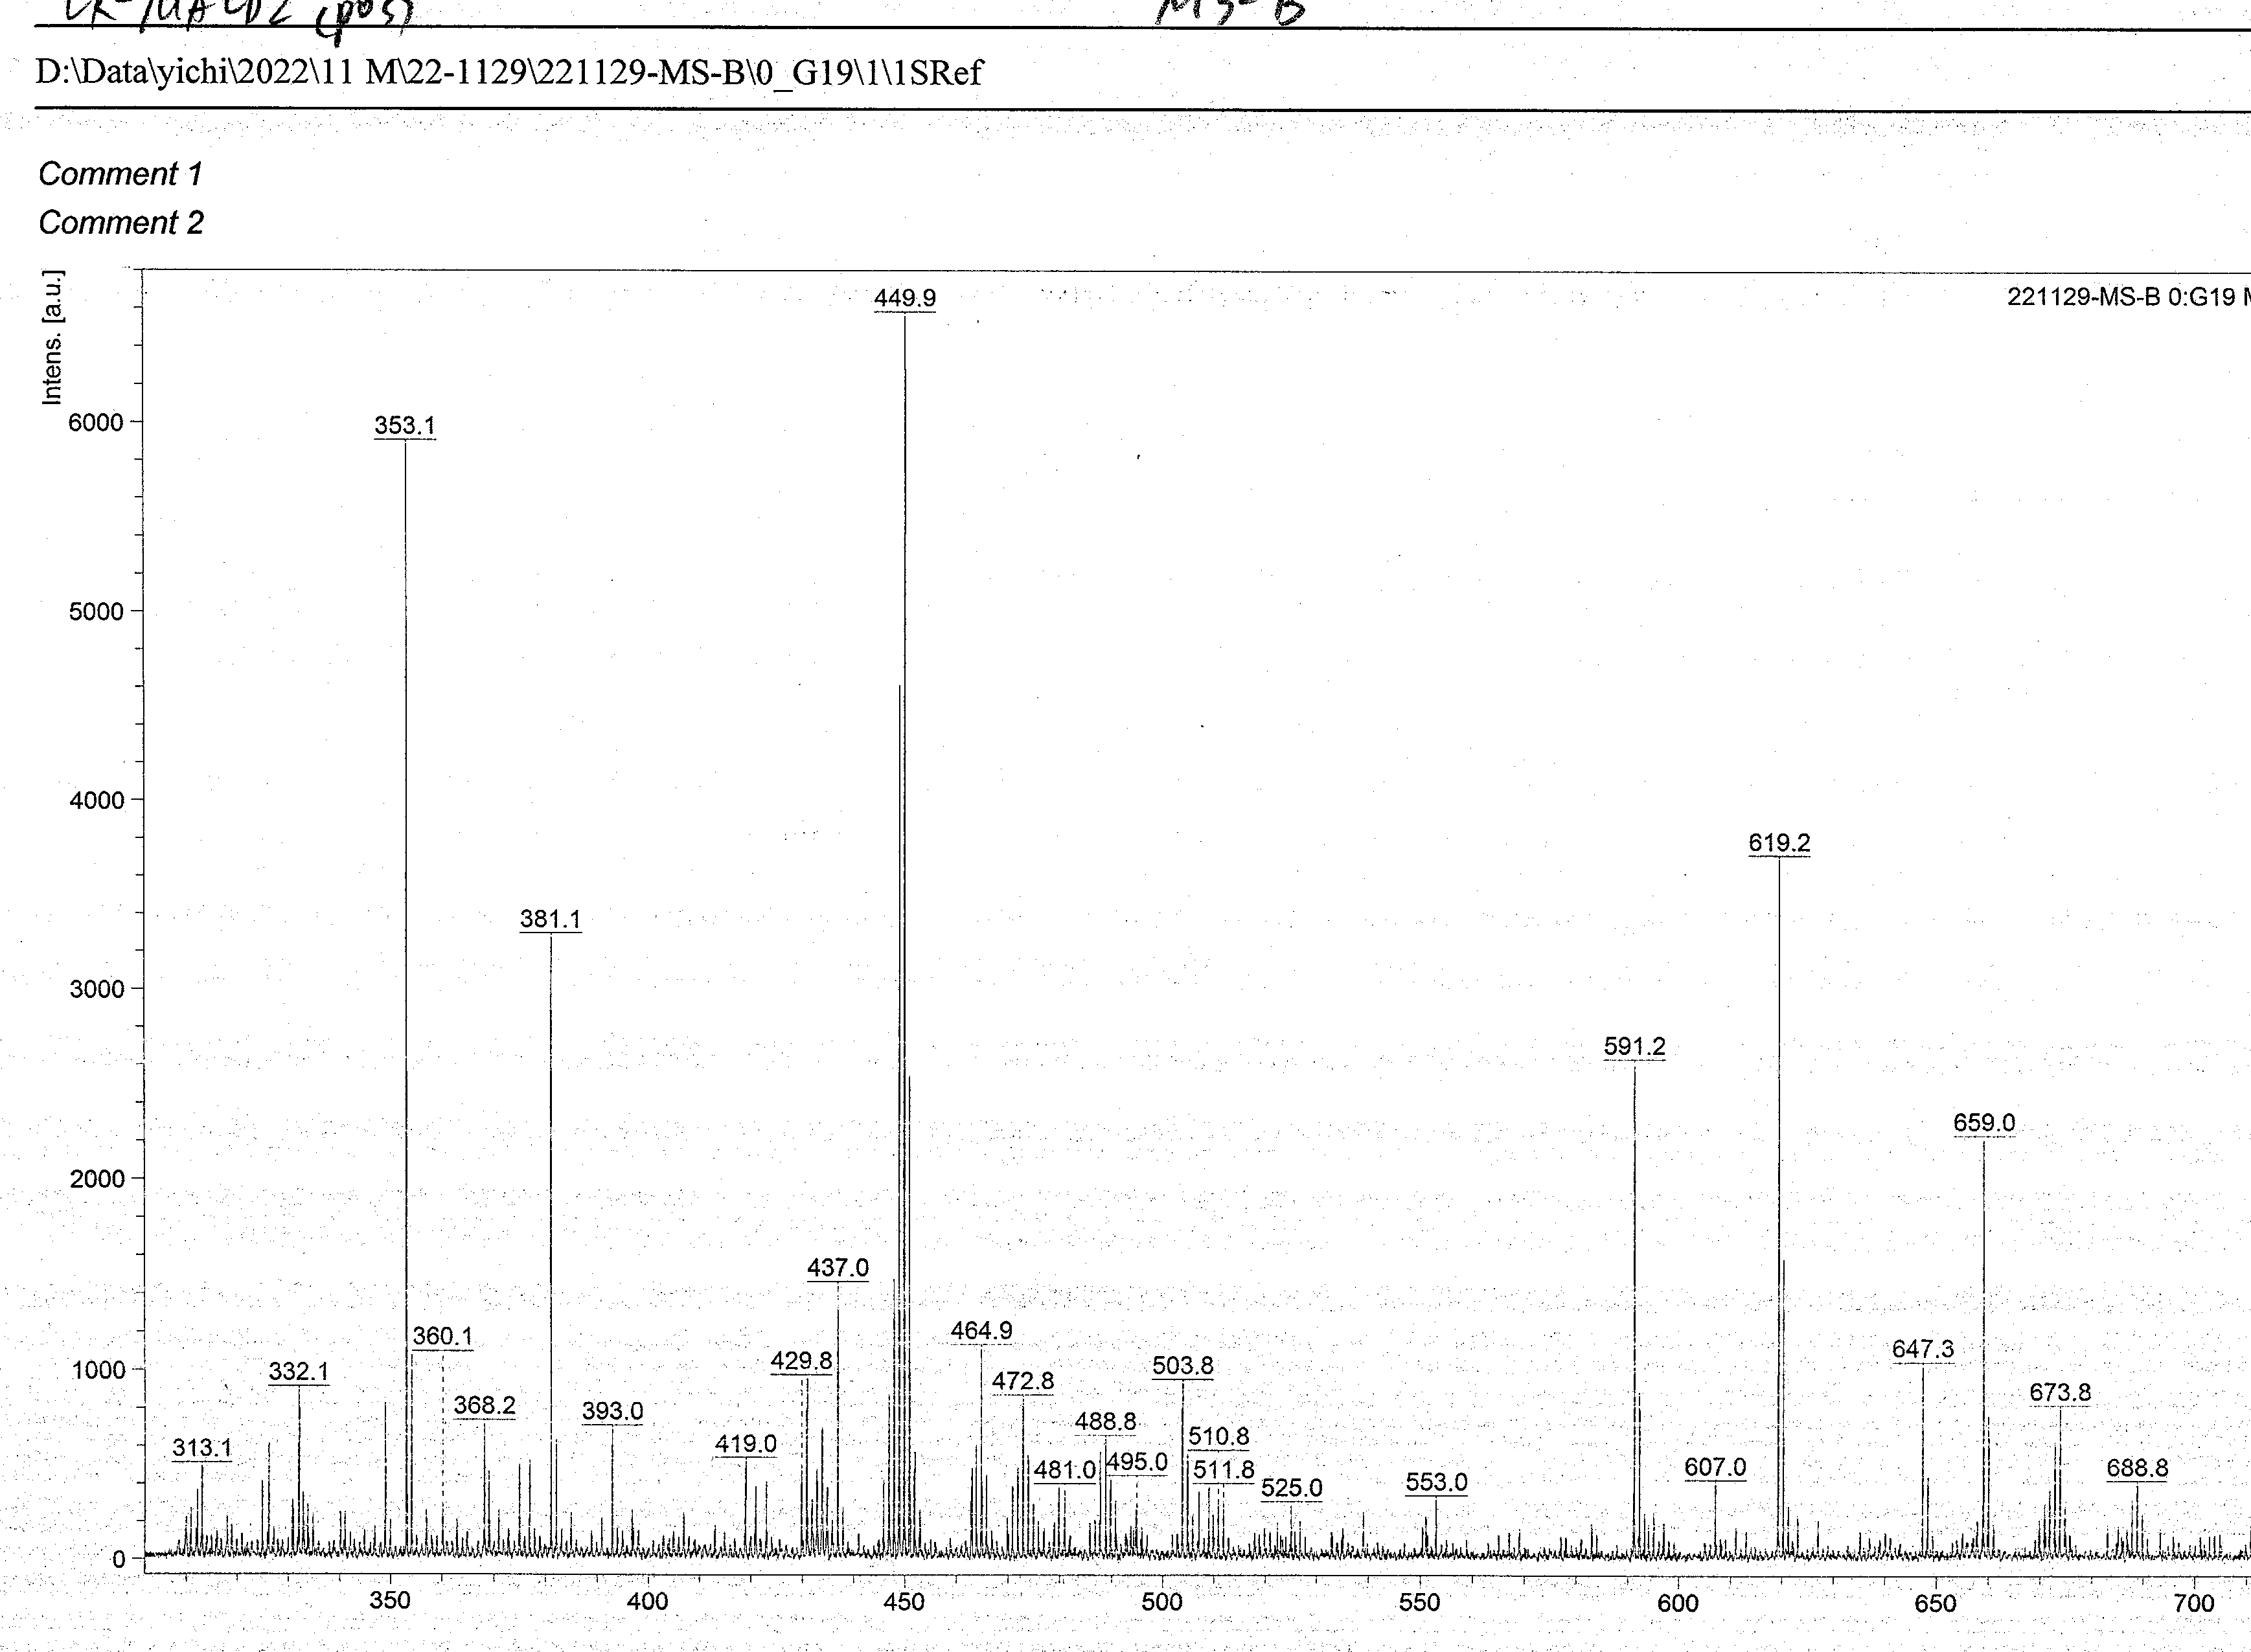


# Figure S44: FT-IR Spectrum of Taraxerol (5).


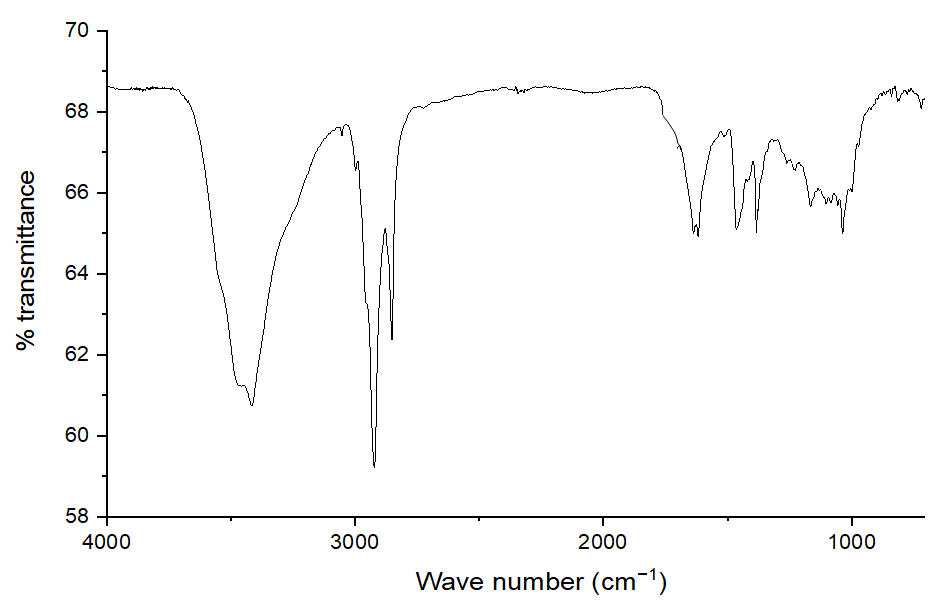


# Figure S45: 1H-NMR (600 MHz, CDCl3) Spectrum of Myricadiol (6).

# Figure S46: 13C-NMR (125 MHz, CDCl3) Spectrum of Myricadiol (6).

# Figure S47: DEPT-135 Spectrum of Myricadiol (6).

# Figure S48: 1H-1H COSY Spectrum of Myricadiol (6).

# Figure S49: HSQC Spectrum of Myricadiol (6).

# Figure S50: HMBC Spectrum of Myricadiol (6).

# Figure S51: NOSEY Spectrum of Myricadiol (6).

# Figure S52: MALDI-MS/MS Spectrum of Myricadiol (6).


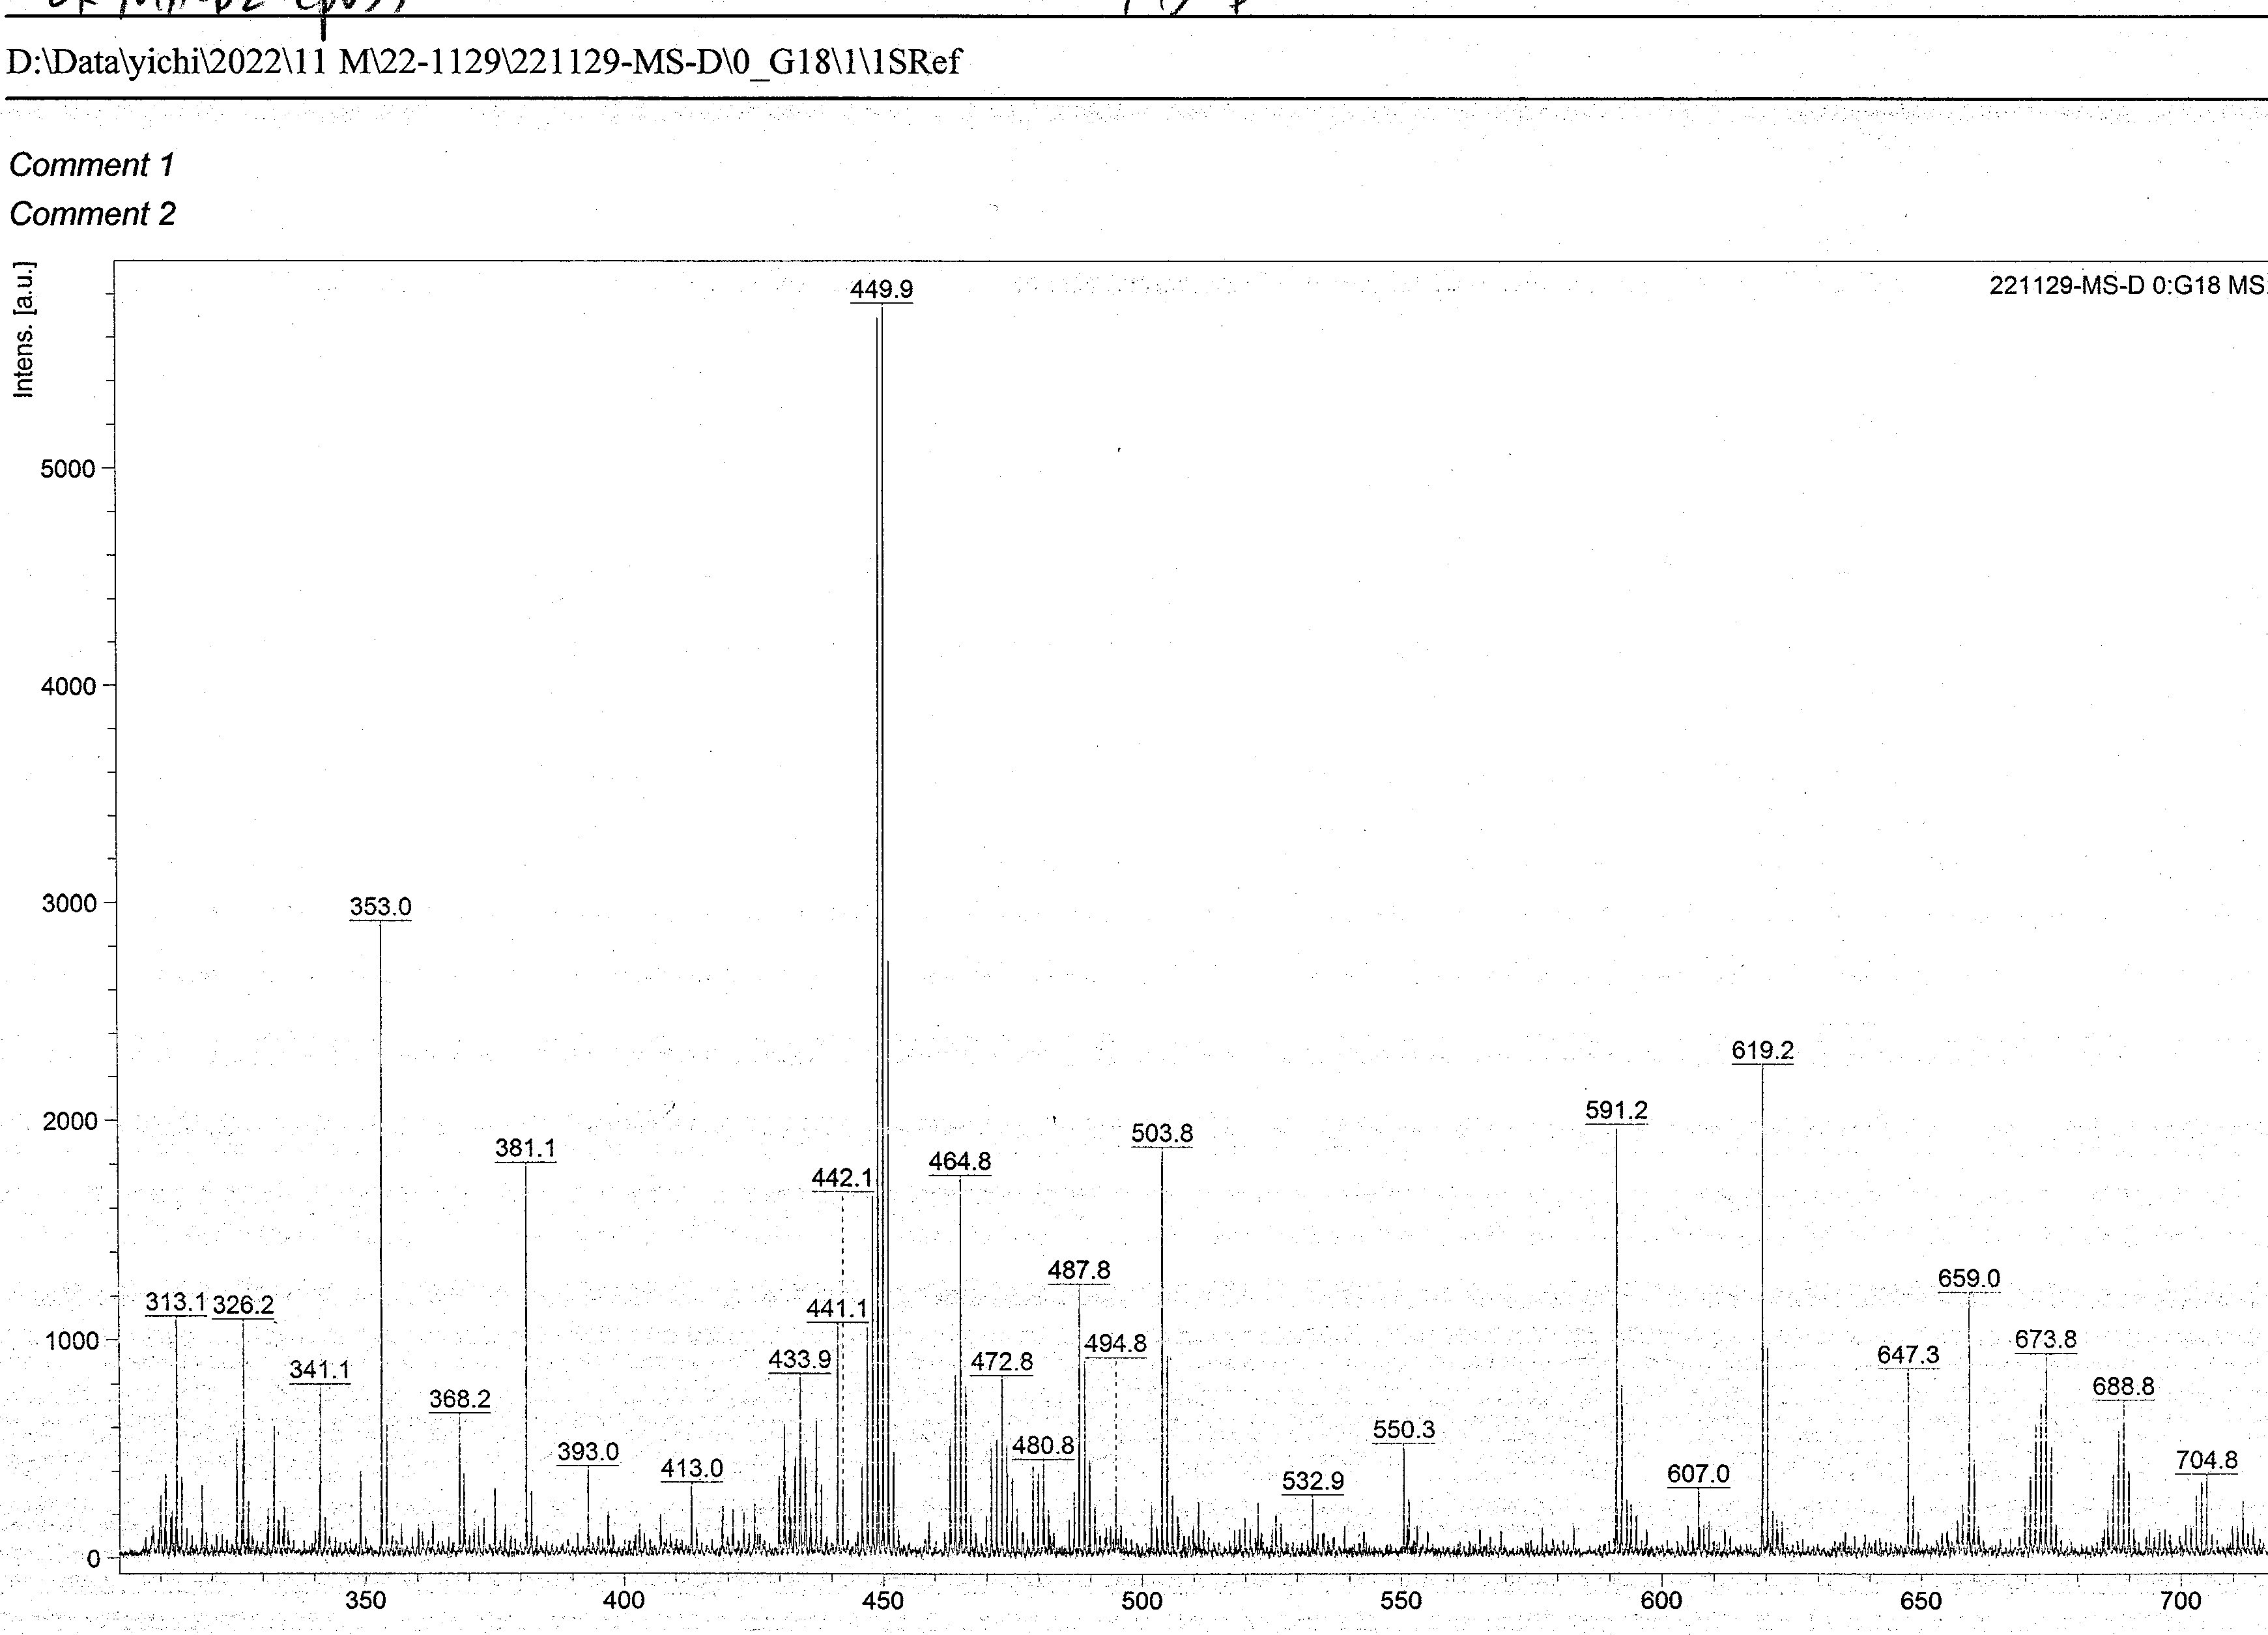


#

# Figure S53: FT-IR Spectrum of Myricadiol (6).

# Figure S54: 1H-NMR (600 MHz, DMSO) Spectrum of 3-*O*-*trans*-Caffeoylisomyricadiol (7).

# Figure S55: 13C-NMR (125 MHz, DMSO) Spectrum of 3-*O*-*trans*-Caffeoylisomyricadiol (7).

# Figure S56: DEPT-135 Spectrum of 3-*O*-*trans*-Caffeoylisomyricadiol (7).

# Figure S57: 1H-1H COSY Spectrum of 3-*O*-*trans*-Caffeoylisomyricadiol (7).

# Figure S58: HSQC Spectrum of 3-*O*-*trans*-Caffeoylisomyricadiol (7).

# Figure S59: HMBC Spectrum of 3-*O*-*trans*-Caffeoylisomyricadiol (7).

# Figure S60: NOSEY Spectrum of 3-*O*-*trans*-Caffeoylisomyricadiol (7).

#

# Figure S61: MALDI-MS/MS Spectrum of 3-*O*-*trans*-Caffeoylisomyricadiol (7).


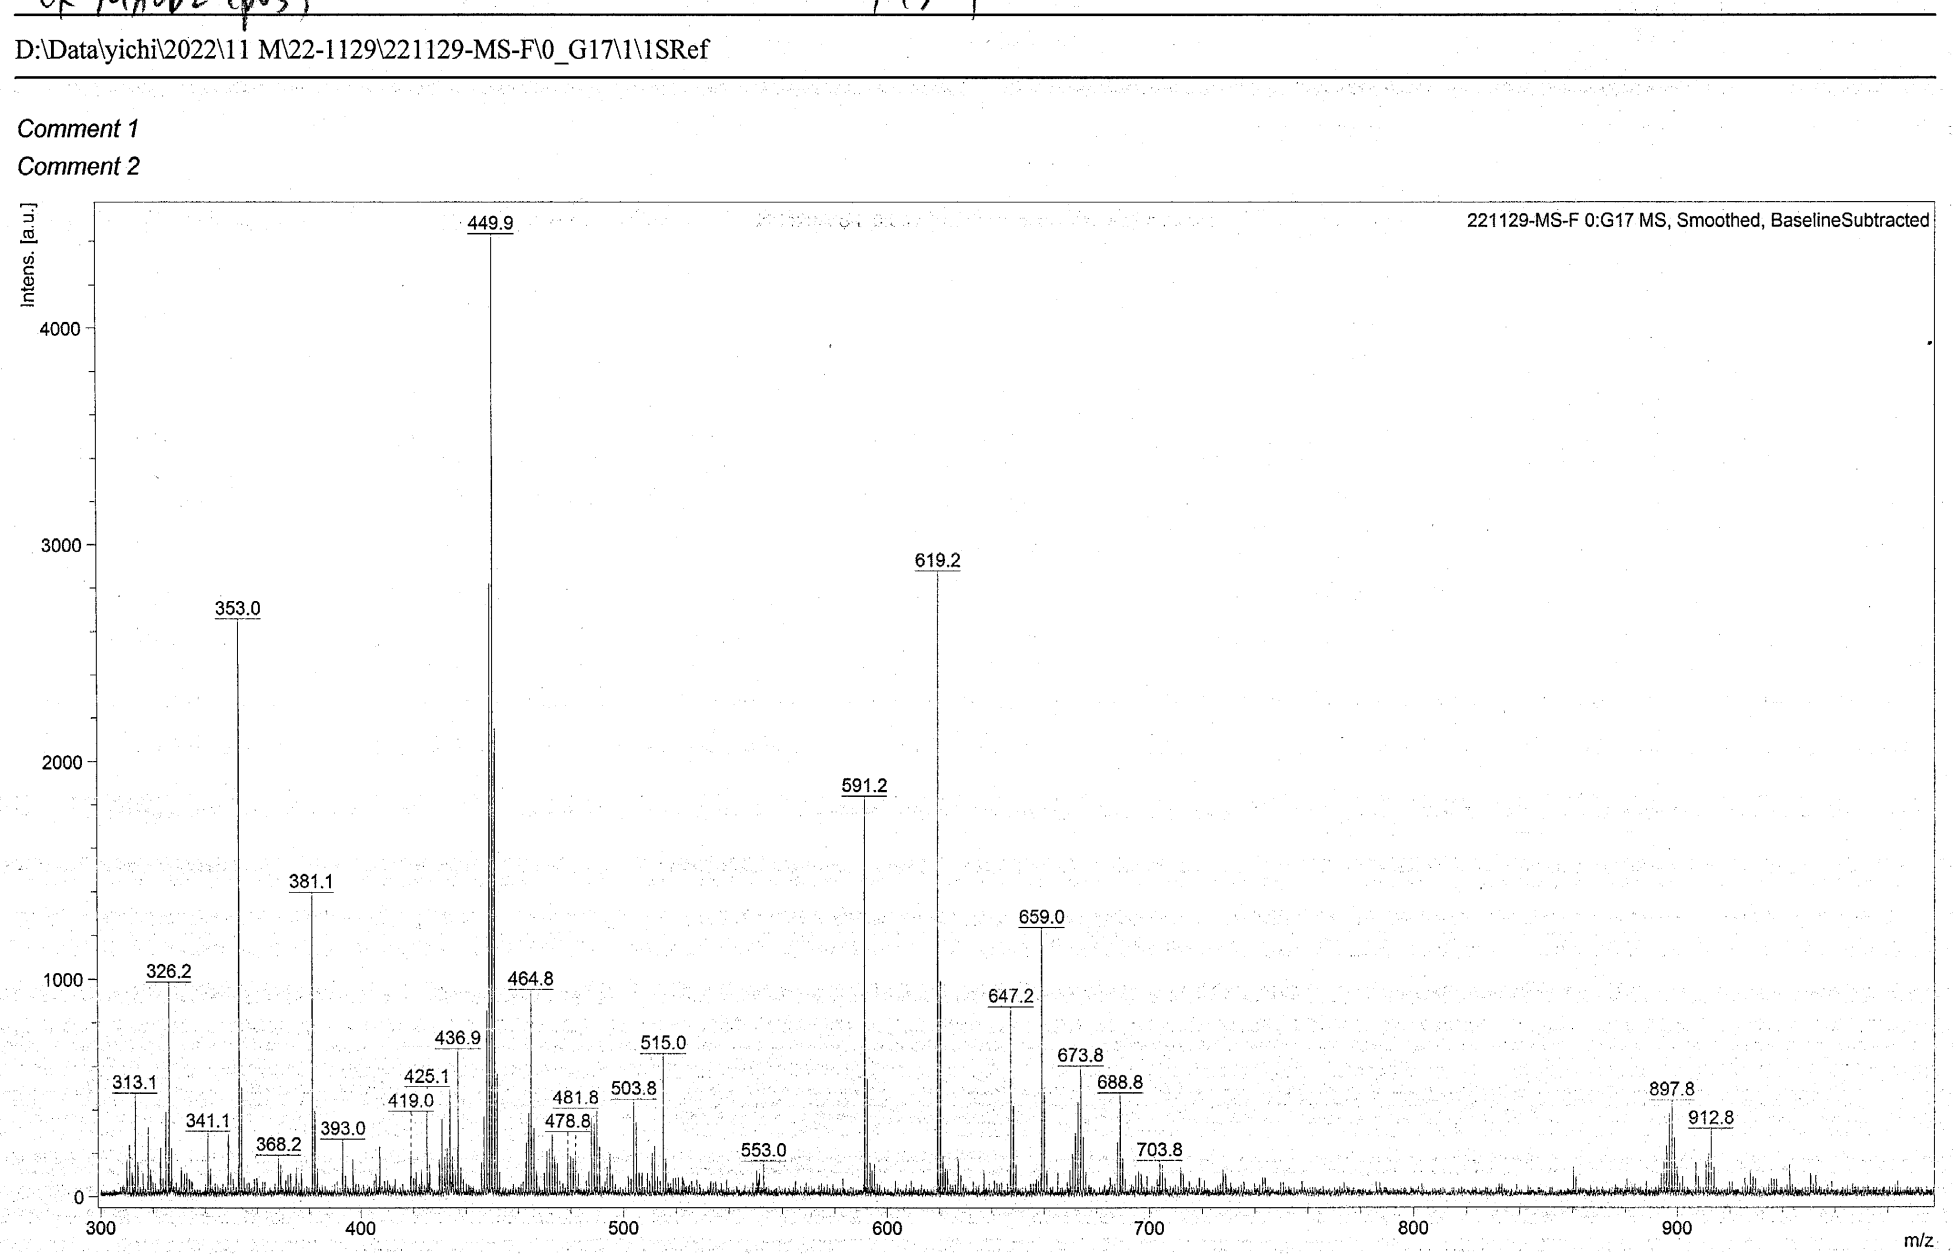


# Figure S62: FT-IR Spectrum of 3-*O*-*trans*-Caffeoylisomyricadiol (7).

# Figure S63: 1H-NMR (600 MHz, MeOD) Spectrum of methyl-*β*-D-glucopyranoses (8).

# Figure S64: 13C-NMR (125 MHz, MeOD) Spectrum of methyl-*β*-D-glucopyranoses (8).

# Figure S65: DEPT-135 Spectrum of methyl-*β*-D-glucopyranoses (8).

# Figure S66: 1H-1H COSY Spectrum of methyl-*β*-D-glucopyranoses (8).

# Figure S67: HSQC Spectrum of methyl-*β*-D-glucopyranoses (8).

# Figure S68: HMBC Spectrum of methyl-*β*-D-glucopyranoses (8).

# Figure S69: ESIMS/MS Spectrum of methyl-*β*-D-glucopyranoses (8).


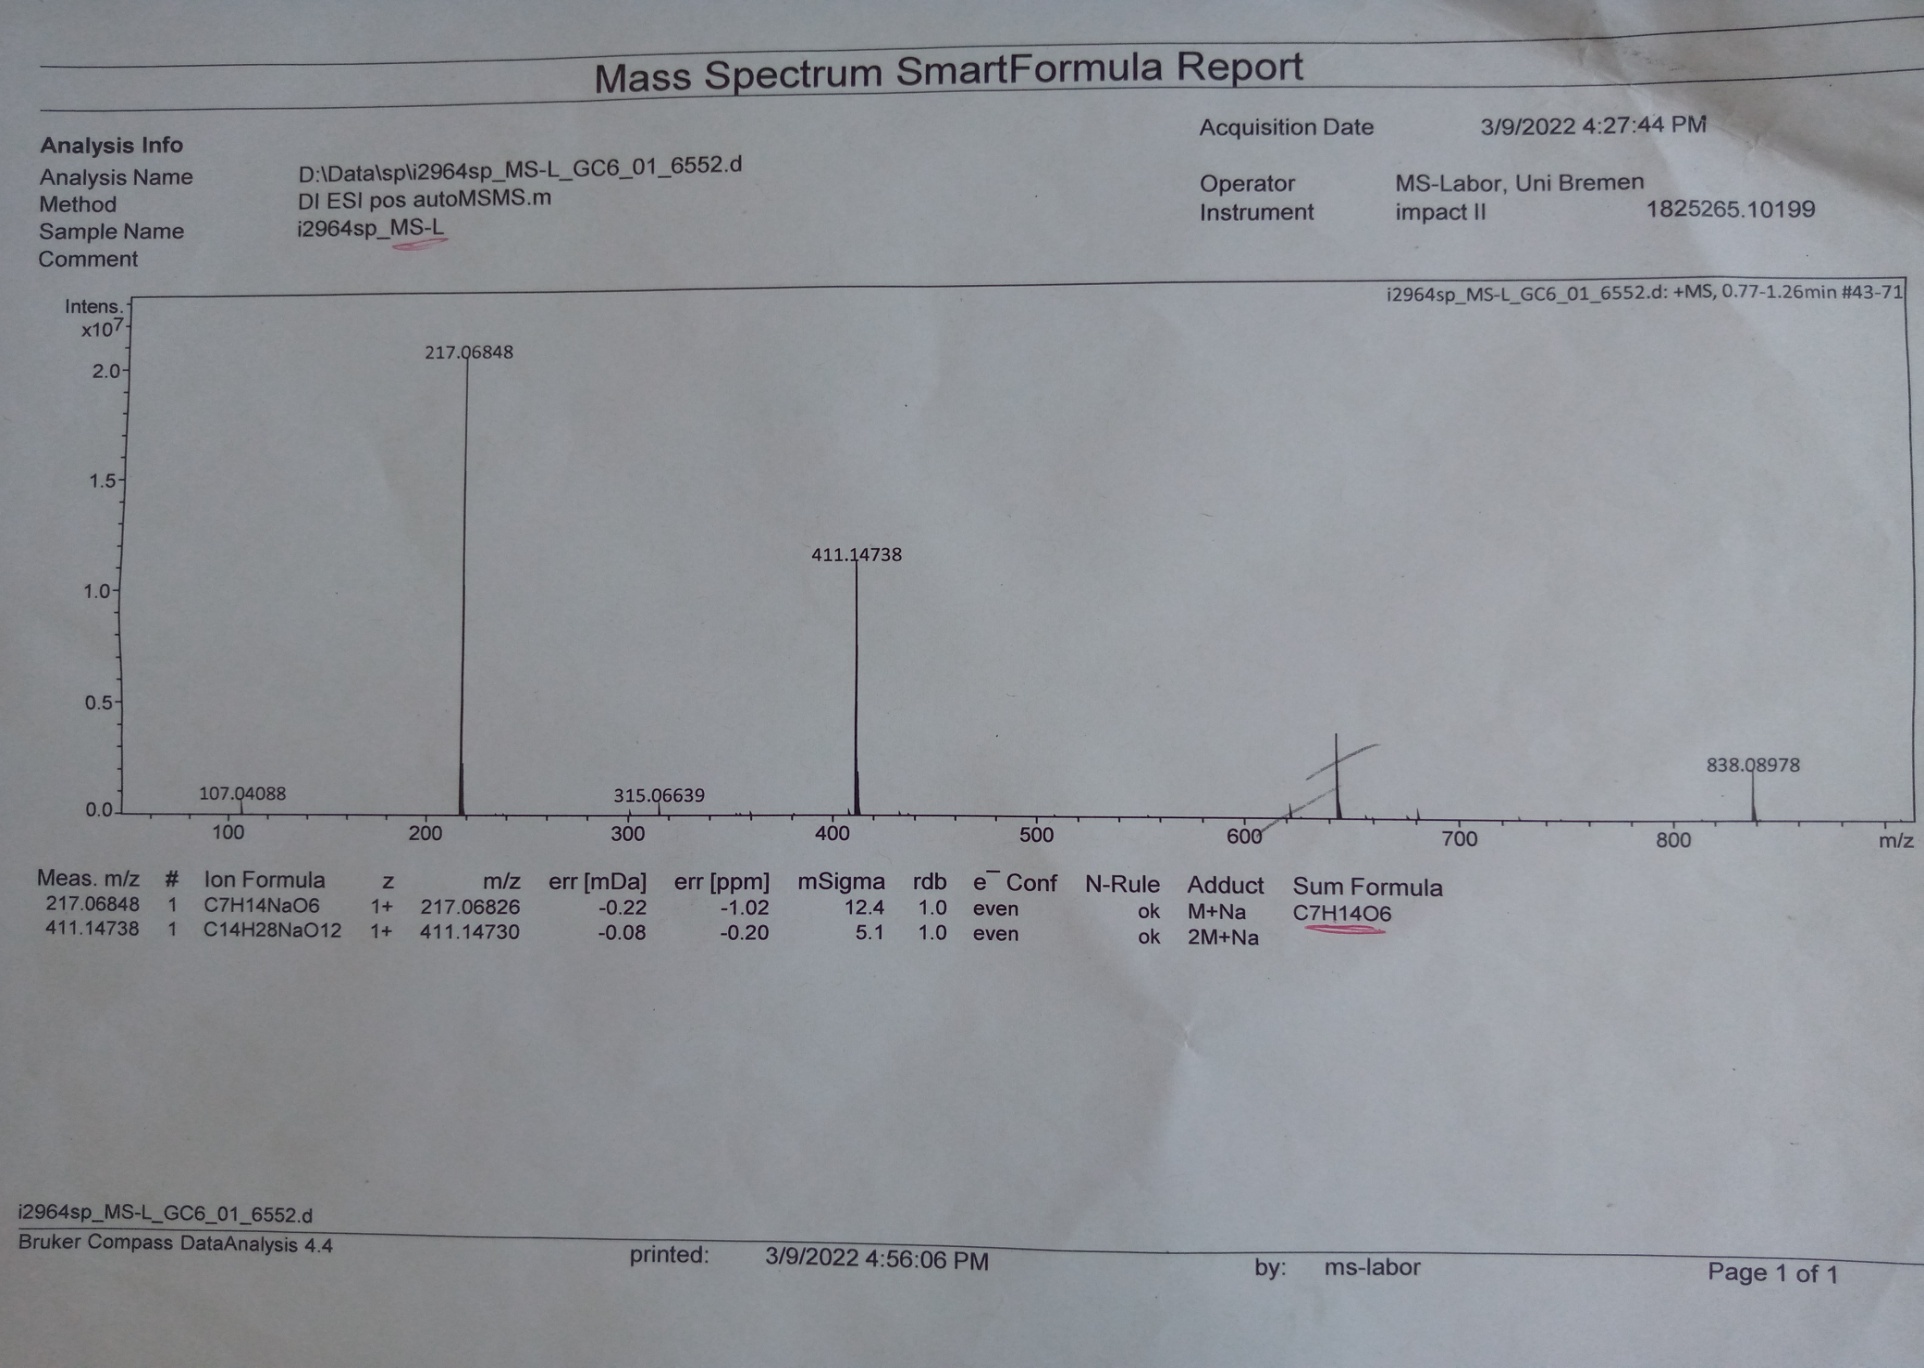


# Figure S70: FT-IR Spectrum of methyl-*β*-D-glucopyranoses (8).
